# Supplementary material for: Association between female reproductive factors and gout: a nationwide population-based cohort study of 1 million postmenopausal women
Source: PubMed Central journal article supplement (PMC8675498; doi:10.1186/s13075-021-02701-w), 2021-12-16
Supplement: 13075_2021_2701_MOESM1_ESM.pdf [file 13075_2021_2701_MOESM1_ESM.pdf]

**Supplementary Table S1** Hazard ratios and 95% confidence intervals for incident gout according to age at menarche

| Reproductive factors    | Subjects (N) | Events (n) | Follow-up duration (PYs) | IR   | HR (95% CI)*            |
|-------------------------|--------------|------------|--------------------------|------|-------------------------|
| Age at menarche (years) |              |            |                          |      |                         |
| ≤12                     | 11,847       | 635        | 96,616                   | 6.57 | 1 (Ref.)                |
| 13-14                   | 146,020      | 8,329      | 1,188,213                | 7.01 | 1.06 (0.97–1.15)        |
| 15-16                   | 430,498      | 24,984     | 3,505,757                | 7.13 | 1.06 (0.98–1.14)        |
| >16                     | 488,013      | 30,104     | 3,975,279                | 7.57 | <b>1.09 (1.01–1.18)</b> |
| <i>p</i> for trend      |              |            |                          |      | <b>&lt;.0001</b>        |

PY, person-years; IR, incidence rate per 10,000 person-years; HR, hazard ratio; CI, confidence interval; Ref., reference group

\*Multivariable model included age, age at menarche, body mass index, smoking, alcohol consumption, regular exercise, hypertension, diabetes mellitus, hyperlipidemia, chronic kidney disease, and income.

**Supplementary Table S2** Hazard ratios and 95% confidence intervals for incident gout according to parity and oral contraceptives use

| Reproductive factors        | Subjects (N) | Events (n) | Follow-up duration (PYs) | IR   | HR (95% CI)*            |
|-----------------------------|--------------|------------|--------------------------|------|-------------------------|
| Oral contraceptives (years) |              |            |                          |      |                         |
| Never                       | 895,102      | 52,498     | 7,292,924                | 7.20 | 1 (Ref.)                |
| <1                          | 110,098      | 6,846      | 895,403                  | 7.65 | <b>1.05 (1.02–1.07)</b> |
| ≥1                          | 71,178       | 4,708      | 577,539                  | 8.15 | <b>1.07 (1.04–1.10)</b> |
| <i>p</i> for trend          |              |            |                          |      | <b>&lt;.0001</b>        |
| Parity                      |              |            |                          |      |                         |
| 0 children                  | 28,422       | 1,700      | 230,168                  | 7.39 | 1 (Ref.)                |
| 1 child                     | 73,227       | 4,210      | 595,161                  | 7.07 | 0.98 (0.93–1.04)        |
| ≥2 children                 | 974,729      | 58,142     | 7,940,536                | 7.32 | 0.97 (0.92–1.02)        |
| <i>p</i> for trend          |              |            |                          |      | 0.9295                  |

PY, person-years; IR, incidence rate per 10,000 person-years; HR, hazard ratio; CI, confidence interval; Ref., reference group

\*Multivariable model included age, age at menarche, oral contraceptives, parity, body mass index, smoking, alcohol consumption, regular exercise, hypertension, diabetes mellitus, hyperlipidemia, chronic kidney disease, and income.

**Supplementary Table S3** Hazard ratios and 95% confidence intervals for incident gout according to parity, breastfeeding and oral contraceptives use who had parity (n = 1,047,956)

| Reproductive factors        | Subjects (N) | Events (n) | Follow-up duration (PYs) | IR   | HR (95% CI)*            |
|-----------------------------|--------------|------------|--------------------------|------|-------------------------|
| Oral contraceptives (years) |              |            |                          |      |                         |
| Never                       | 870351       | 51041      | 7092479.39               | 7.20 | 1 (Ref.)                |
| <1                          | 108131       | 6716       | 879496.97                | 7.64 | <b>1.05 (1.02–1.07)</b> |
| ≥1                          | 69474        | 4595       | 563721.26                | 8.15 | <b>1.07 (1.04–1.10)</b> |
| <i>p</i> for trend          |              |            |                          |      | <b>&lt;.0001</b>        |
| Parity                      |              |            |                          |      |                         |
| 1 child                     | 73227        | 4210       | 595161.47                | 7.07 | 1 (Ref.)                |
| ≥2 children                 | 974729       | 58142      | 7940536.15               | 7.32 | 0.99 (0.95–1.02)        |
| <i>p</i> for trend          |              |            |                          |      | 0.3960                  |
| Breastfeeding (months)      |              |            |                          |      |                         |
| Never                       | 58981        | 3424       | 479148.99                | 7.15 | 1 (Ref.)                |
| <6                          | 77216        | 4014       | 629367.16                | 6.38 | <b>0.93 (0.89–0.97)</b> |
| 6-12                        | 197091       | 11082      | 1605635.33               | 6.90 | 0.96 (0.93–1.00)        |
| ≥12                         | 714668       | 43832      | 5821546.13               | 7.53 | 0.98 (0.95–1.02)        |
| <i>p</i> for trend          |              |            |                          |      | <b>&lt;.0001</b>        |

PY, person-years; IR, incidence rate per 10,000 person-years; HR, hazard ratio; CI, confidence interval; Ref., reference group

\*Multivariable models included age, age at menarche, oral contraceptives, parity, breastfeeding, body mass index, smoking, alcohol consumption, regular exercise, hypertension, diabetes mellitus, hyperlipidemia, chronic kidney disease, and income.

**Supplementary Table S4** Hazard ratios and 95% confidence intervals for incident gout according to age at menopause

| Reproductive factors     | Subjects (N) | Events (n) | Follow-up duration (PYs) | IR   | HR (95% CI)*            |
|--------------------------|--------------|------------|--------------------------|------|-------------------------|
| Age at menopause (years) |              |            |                          |      |                         |
| <40                      | 15,754       | 1,091      | 127,654                  | 8.55 | <b>1.16 (1.08–1.22)</b> |
| 40-44                    | 53,742       | 3,412      | 436,253                  | 7.82 | <b>1.08 (1.04–1.12)</b> |
| 45-49                    | 290,992      | 17,389     | 2,371,231                | 7.33 | <b>1.04 (1.02–1.06)</b> |
| 50-54                    | 597,465      | 34,968     | 4,867,834                | 7.18 | 1 (Ref.)                |
| ≥55                      | 118,425      | 7,192      | 962,894                  | 7.47 | <b>0.97 (0.94–0.99)</b> |
| <i>p</i> for trend       |              |            |                          |      | <b>&lt;.0001</b>        |

PY, person-years; IR, incidence rate per 10,000 person-years; HR, hazard ratio; CI, confidence interval; Ref., reference group

\*Multivariable models includes age, age at menarche, age at menopause, oral contraceptives, parity, breastfeeding, body mass index, smoking, alcohol consumption, regular exercise, hypertension, diabetes mellitus, hyperlipidemia, chronic kidney disease, and income.

**Supplementary Table S5** Hazard ratios and 95% confidence intervals for incident gout according to hormone replacement therapy

| Reproductive factors                | Subjects (N) | Events (n) | Follow-up duration (PYs) | IR   | HR (95% CI)*            |
|-------------------------------------|--------------|------------|--------------------------|------|-------------------------|
| Hormone replacement therapy (years) |              |            |                          |      |                         |
| Never                               | 877,088      | 51,071     | 7,142,979                | 7.15 | 1 (Ref.)                |
| <2                                  | 116,184      | 7,508      | 946,434                  | 7.93 | <b>1.16 (1.13–1.18)</b> |
| 2-5                                 | 47,584       | 3,075      | 387,867                  | 7.93 | <b>1.16 (1.12–1.21)</b> |
| ≥5                                  | 35,522       | 2,398      | 288,586                  | 8.31 | <b>1.19 (1.14–1.23)</b> |
| <i>p</i> for trend                  |              |            |                          |      | <b>&lt;.0001</b>        |

PY, person-years; IR, incidence rate per 10,000 person-years; HR, hazard ratio; CI, confidence interval; Ref., reference group

\*Multivariable model includes age, age at menarche, age at menopause, oral contraceptives, hormone replacement therapy, parity, breastfeeding, body mass index, smoking, alcohol consumption, regular exercise, hypertension, diabetes mellitus, hyperlipidemia, chronic kidney disease, and income.
